# Supplementary material for: Evaluating Foundational Data Quality in the National Patient-Centered Clinical Research Network (PCORnet®)
Source: PubMed Central journal article supplement (PMC5983028; doi:10.5334/egems.199), 2018-04-13
Supplement: egems-6-1-199-s1.pdf [file egems-6-1-199-s1.pdf]

## Sample PCORnet Cycle 1 Empirical Data Characterization Report

This report is derived from a DataMart's responses to the Data Characterization Query Package. Please refer to the Work Plan for details about the source tables.

DataMart: N/A

Response Date: N/A

Low Cell Count Threshold: N/A

| Section                                                        | Table      | Table Description                                                                    | Data Check(s)    |
|----------------------------------------------------------------|------------|--------------------------------------------------------------------------------------|------------------|
| Section I: Descriptive Information and Analysis Considerations | Table IA   | Demographic Summary                                                                  | n/a              |
|                                                                | Table IB   | PCORnet Dashboard Metrics                                                            | n/a              |
|                                                                | Table IC   | Height, Weight and Body Mass Index (BMI)                                             | n/a              |
|                                                                | Table ID   | Records, Patients, Encounters, and Date Ranges by Table                              | 4.01, 4.02, 4.03 |
|                                                                | Chart IA   | Vital Measures by Measurement Date, 2010-Present                                     | n/a              |
|                                                                | Table IE   | Records Per Table By Encounter Type                                                  | 4.04             |
|                                                                | Table IF   | Records Per Table By Year                                                            | n/a              |
|                                                                | Chart IB   | Trend in Encounters by Admit Date and Encounter Type, 2010-Present                   | n/a              |
|                                                                | Chart IC   | Trend in Institutional Encounters by Discharge Date and Encounter Type, 2010-Present | n/a              |
|                                                                | Table IG   | Date Obfuscation or Imputation                                                       | 4.05             |
| Section II: Data Model Conformance                             | Table IIA  | Primary Key Definitions                                                              | 1.05             |
|                                                                | Table IIB  | Values Outside of CDM Specifications                                                 | 1.06             |
|                                                                | Table IIC  | Non-Permissible Missing Values                                                       | 1.07             |
| Section III: Data Plausibility                                 | Table IIIA | Future Dates                                                                         | 2.01             |
|                                                                | Table IIIB | Records With Extreme Values                                                          | 2.02             |
| Section IV: Data Completeness                                  | Table IVA  | Diagnosis Records Per Encounter, Overall and by Encounter Type                       | 3.01             |
|                                                                | Chart IVA  | Diagnosis Records Per Encounter by Admit Date and Encounter Type, 2010-Present       | n/a              |
|                                                                | Table IVB  | Procedure Records Per Encounter, Overall and by Encounter Type                       | 3.02             |
|                                                                | Chart IVB  | Procedure Records Per Encounter by Admit Date and Encounter Type, 2010-Present       | n/a              |
|                                                                | Table IVC  | Missing or Unknown Values                                                            | 3.03, 3.04       |

Response date is the date the data characterization query package was run, not the date the results were received by the DRN OC. Cell counts below the low-cell count threshold will be displayed as 'BT' (below threshold) and treated as zeroes (0s).

Table IA. Demographic Summary

This table contains general descriptive information about the patients in the DEMOGRAPHIC table. These patients may or may not be represented in other CDM tables.

|                       | N         | %    | Source table       |
|-----------------------|-----------|------|--------------------|
| Patients              | 1,132,186 |      | DEM_L3_N           |
| Age                   |           |      | DEM_L3_AGEYRSDIST1 |
| Mean                  | 42        |      |                    |
| Median                | 40        |      |                    |
| Age group             |           |      | DEM_L3_AGEYRSDIST2 |
| 0-18                  | 200,924   | 17.7 |                    |
| 19-64                 | 732,213   | 64.6 |                    |
| 65+                   | 197,837   | 17.5 |                    |
| Missing, NI, UN or OT | 1,212     | 0.1  |                    |
| Hispanic              |           |      | DEM_L3_HISPDIST    |
| N (No)                | 265,498   | 23.5 |                    |
| R (Refused)           | 0         | 0.0  |                    |
| Y (Yes)               | 65,357    | 5.8  |                    |
| Missing, NI, UN or OT | 801,331   | 70.8 |                    |
| Sex                   |           |      | DEM_L3_SEXDIST     |
| A (Ambiguous)         | 0         | 0.0  |                    |
| F (Female)            | 586,496   | 51.8 |                    |
| M (Male)              | 544,340   | 48.1 |                    |
| Missing, NI, UN or OT | 1,350     | 0.1  |                    |

Table excludes records with values outside of CDM specifications.

Cell counts below the low-cell count threshold are displayed as 'BT' and treated as zeroes (0s). Sums which include 'BT' values are marked with an asterisk (\*).

If applicable, data check exceptions are highlighted.

Table IA. Demographic Summary (continued)

|                                                | N       | %    | Source table    |
|------------------------------------------------|---------|------|-----------------|
| Race                                           |         |      | DEM_L3_RACEDIST |
| 01 (American Indian or Alaska Native)          | 8,112   | 0.7  |                 |
| 02 (Asian)                                     | 41,983  | 3.7  |                 |
| 03 (Black or African American)                 | 29,691  | 2.6  |                 |
| 04 (Native Hawaiian or Other Pacific Islander) | 7,382   | 0.7  |                 |
| 05 (White)                                     | 643,830 | 56.9 |                 |
| 06 (Multiple Race)                             | 0       | 0.0  |                 |
| 07 (Refuse to answer)                          | 0       | 0.0  |                 |
| Missing, NI, UN or OT                          | 401,188 | 35.4 |                 |

Table excludes records with values outside of CDM specifications.

Cell counts below the low-cell count threshold are displayed as 'BT' and treated as zeroes (0s). Sums which include 'BT' values are marked with an asterisk (\*).

If applicable, data check exceptions are highlighted.

Table IB. PCORnet Dashboard Metrics

This table contains the PCORnet Dashboard Metrics which are derived from the data characterization query responses.

| Metric                                                                           | Metric Description                                                                            | Result     | Source table  |
|----------------------------------------------------------------------------------|-----------------------------------------------------------------------------------------------|------------|---------------|
| Unique patients                                                                  | Number of unique patients with at least 1 encounter                                           | 835,112    | ENC_L3_N      |
| Unique encounters                                                                | Number of unique encounters                                                                   | 47,786,158 | ENC_L3_N      |
| Potential pool of patients for observational studies                             | Number of unique patients with at least 1 ED, EI, IP, or AV encounter within the past 5 years | 749,643    | ENC_L3_DASH2  |
| Potential pool of patients for trials                                            | Number of unique patients with at least 1 ED, EI, IP, or AV encounter within the past 1 year  | 434,053    | ENC_L3_DASH2  |
| Unique patients with encounters and (a) vital signs, (b) diagnoses, and (c) both | Number of unique patients with VITAL and ENCOUNTER records                                    | 564,710    | VIT_L3_DASH1  |
|                                                                                  | Number of unique patients with DIAGNOSIS and ENCOUNTER records                                | 780,174    | DIA_L3_DASH1  |
|                                                                                  | Number of unique patients with DIAGNOSIS, VITAL and ENCOUNTER records                         | 562,202    | XTBL_L3_DASH1 |

Table excludes records with values outside of CDM specifications.

Cell counts below the low-cell count threshold are displayed as 'BT' and treated as zeroes (0s). Sums which include 'BT' values are marked with an asterisk (\*).

If applicable, data check exceptions are highlighted.

## Table IC. Height, Weight, and Body Mass Index

This table contains descriptive statistics and frequencies of VITAL table measurements.

|                                    | Result    | %    | Source table   |
|------------------------------------|-----------|------|----------------|
| Height measurements                |           |      | VIT_L3_HT_DIST |
| Records                            | 3,690,854 |      |                |
| Height (inches), mean              | 63        |      |                |
| Height (inches), median            | 65        |      |                |
| Weight measurements                |           |      | VIT_L3_WT_DIST |
| Records                            | 7,075,486 |      |                |
| Weight (lbs.), mean                | 166       |      |                |
| Weight (lbs.), median              | 167       |      |                |
| Body Mass Index (BMI) measurements |           |      | VIT_L3_BMI     |
| Records                            | 5,380,184 |      |                |
| BMI <=25                           | 1,945,303 | 36.2 |                |
| BMI 26-30                          | 1,557,050 | 28.9 |                |
| BMI >=31                           | 1,877,831 | 34.9 |                |

Table excludes records with null or missing values.

Cell counts below the low-cell count threshold are displayed as 'BT' and treated as zeroes (0s). Sums which include 'BT' values are marked with an asterisk (\*).

**Table ID. Records, Patients, Encounters, and Date Ranges by Table**

This table contains summary counts by table and supports Data Checks 4.01, 4.02, and 4.03. When possible, DataMarts should include data from no later than 2010 to the present. Since the date range may be affected by outlier values the percentage of records prior to January 2010 is also displayed.

|                              | DEMOGRAPHIC                | ENROLLMENT                 | ENCOUNTER                  | DIAGNOSIS                  | PROCEDURES                 | VITAL                      |
|------------------------------|----------------------------|----------------------------|----------------------------|----------------------------|----------------------------|----------------------------|
| <b>Records</b>               |                            |                            |                            |                            |                            |                            |
| N                            | 3,421,157                  | 850,086                    | 76,452,217                 | 75,437,911                 | 49,028,003                 | 62,251,061                 |
| <b>Patients</b>              |                            |                            |                            |                            |                            |                            |
| N                            | 3,421,157                  | 850,086                    | 3,337,171                  | 3,314,844                  | 1,868,195                  | 2,828,652                  |
| <b>Encounters</b>            |                            |                            |                            |                            |                            |                            |
| N                            |                            |                            | 76,452,217                 | 36,783,996                 | 18,162,276                 | 20,676,514                 |
| <b>Date Range</b>            |                            |                            |                            |                            |                            |                            |
| Field                        | BIRTH_DATE                 | ENR_START_DATE             | ADMIT_DATE                 | ADMIT_DATE                 | ADMIT_DATE                 | MEASURE_DATE               |
| Minimum                      | 1841_12                    | 1860_04                    | 1906_04                    | 1979_11                    | 1980_09                    | 1860_04                    |
| Maximum                      | 2015_09                    | 2015_06                    | 2015_09                    | 2015_09                    | 2015_09                    | 2015_09                    |
| % of records before Jan 2010 | 76.0                       | 52.7                       | 34.0                       | 26.4                       | 29.9                       | 17.6                       |
| <b>Source table(s)</b>       | DEM_L3_N;<br>XTBL_L3_DATES | ENR_L3_N;<br>XTBL_L3_DATES | ENC_L3_N;<br>XTBL_L3_DATES | DIA_L3_N;<br>XTBL_L3_DATES | PRO_L3_N;<br>XTBL_L3_DATES | VIT_L3_N;<br>XTBL_L3_DATES |

### Chart IA. Vital Measures by Measurement Date, 2010-Present

This chart illustrates changes over time in the number of records in the VITAL table. Monthly record counts for specific vital measures are not available.

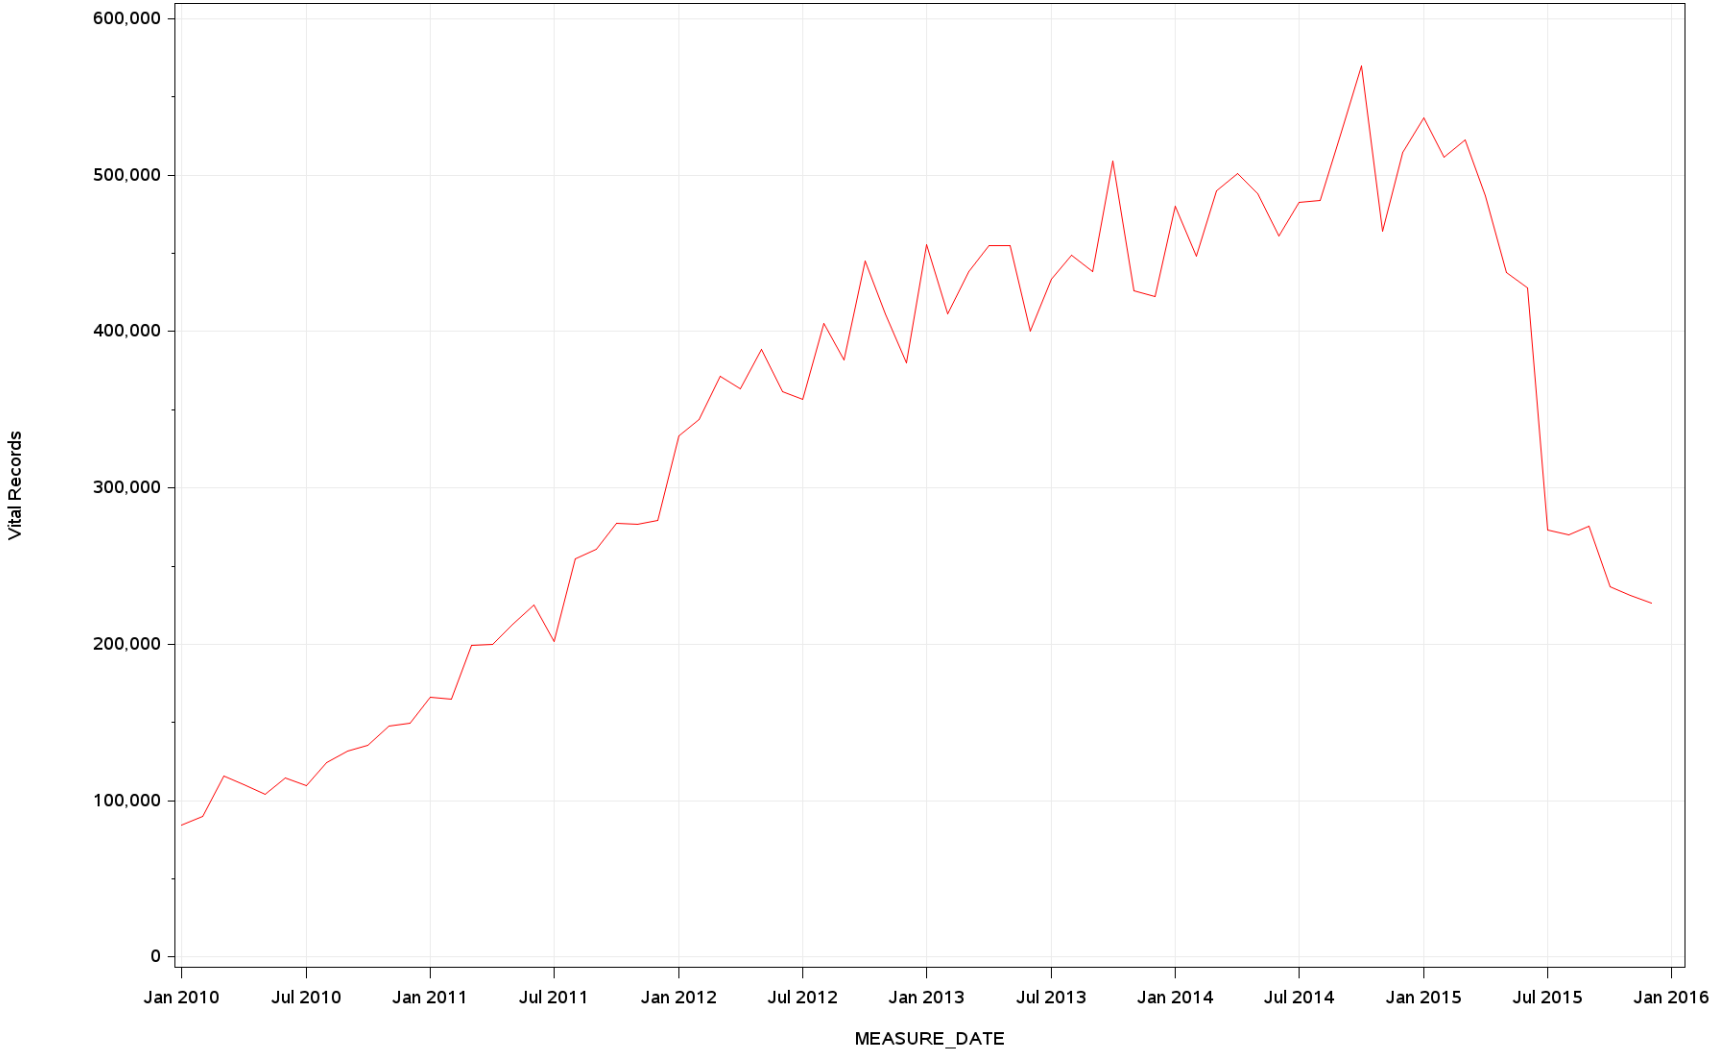

Data check exceptions are highlighted.

Table IE. Records Per Table By Encounter Type

This table contains record counts by encounter type for the ENCOUNTER, DIAGNOSIS, and PROCEDURES tables and supports Data Check 4.04. The presence of ambulatory (AV), inpatient (IP or EI), and emergency department (ED or EI) encounters is not required but may be important for some research studies.

| Encounter Type                    | ENCOUNTER      |      | DIAGNOSIS      |      | PROCEDURES     |      |
|-----------------------------------|----------------|------|----------------|------|----------------|------|
|                                   | N              | %    | N              | %    | N              | %    |
| AV (Ambulatory Visit)             | 267,151        | 2.0  | 26,756,870     | 76.8 | 44,372,674     | 62.2 |
| ED (Emergency Dept)               | 620,593        | 4.6  | 2,139,820      | 6.1  | 3,841,255      | 5.4  |
| EI (ED to IP Stay)                | 0              |      | 0              |      | 0              |      |
| IP (Inpatient Hospital Stay)      | 372,384        | 2.7  | 5,935,177      | 17.0 | 23,117,270     | 32.4 |
| IS (Non-acute Institutional Stay) | 0              |      | 0              |      | 0              |      |
| OA (Other Ambulatory Visit)       | 0              |      | 0              |      | 0              |      |
| Missing, NI, UN or OT             | 12,371,181     | 90.8 | 14,192         | 0.0  | 57,786         | 0.1  |
| Total                             | 13,631,309     |      | 34,846,059     |      | 71,388,985     |      |
| Source table                      | ENC_L3_ENCTYPE |      | DIA_L3_ENCTYPE |      | PRO_L3_ENCTTPE |      |

Table excludes records with values outside of CDM specifications.

Cell counts below the low-cell count threshold are displayed as 'BT' and treated as zeroes (0s). Sums which include 'BT' values are marked with an asterisk (\*).

If applicable, data check exceptions are highlighted.



Table IF. Records Per Table By Year

This table contains the number of records in the ENROLLMENT, ENCOUNTER, DIAGNOSIS, PROCEDURES, and VITAL tables. All years prior to 2010 and after 2015 are combined.

| Year   | ENROLLMENT    |    | ENCOUNTER      |    | DIAGNOSIS      |    | PROCEDURES     |    | VITAL          |    |
|--------|---------------|----|----------------|----|----------------|----|----------------|----|----------------|----|
|        | N             | %  | N              | %  | N              | %  | N              | %  | N              | %  |
| <2010  | 3,868         | 0  | 4,472          | 0  | 16,772         | 0  | 3,784          | 0  |                |    |
| 2010   | 453,190       | 37 | 5,132,775      | 15 | 9,579,702      | 11 | 4,828,419      | 17 |                |    |
| 2011   | 201,157       | 16 | 6,159,793      | 18 | 11,466,005     | 13 | 5,837,139      | 20 | 47,644         | 0  |
| 2012   | 166,524       | 14 | 5,813,230      | 17 | 12,637,481     | 14 | 5,252,536      | 18 | 2,941,904      | 10 |
| 2013   | 137,172       | 11 | 5,890,768      | 17 | 17,257,783     | 19 | 4,770,222      | 17 | 8,397,870      | 30 |
| 2014   | 142,512       | 12 | 5,952,931      | 18 | 19,622,265     | 22 | 4,534,851      | 16 | 9,151,199      | 33 |
| 2015   | 117,233       | 10 | 4,891,909      | 14 | 17,926,884     | 20 | 3,628,841      | 13 | 7,496,363      | 27 |
| >=2016 | 0             | 0  |                |    |                |    |                |    |                |    |
| Total  | 1,221,656     |    | 33,845,878     |    | 88,506,892     |    | 28,855,792     |    | 28,034,980     |    |
| Source | ENR_L3_ENR_YM |    | ENC_L3_ADATE_Y |    | DIA_L3_ADATE_Y |    | PRO_L3_ADATE_Y |    | VIT_L3_MDATE_Y |    |

Table excludes records with null or missing values.

Cell counts below the low-cell count threshold are displayed as 'BT' and treated as zeroes (0s). Sums which include 'BT' values are marked with an asterisk (\*).

Year=ENCOUNTER.ADMIT\_DATE, ENROLLMENT.ENR\_START\_DATE, DIAGNOSIS.ADMIT\_DATE, PROCEDURES.ADMIT\_DATE, or VITAL.MEASURE\_DATE.

### Chart IB. Trend in Encounters by Admit Date and Encounter Type, 2010-Present

This chart illustrates relative changes over time in the number of records per encounter type found in the ENCOUNTER table. Monthly record counts for each encounter type were standardized over the period shown to have a mean of 0 and a standard deviation of 1. The y-axis therefore reflects the deviation in each month's count from the average over the whole time period. A value above the center line of 0 indicates an above-average number of encounters; a value below the center line of 0 indicates a below-average number of encounters. Incomplete data in recent months or the introduction of new encounter types may contribute to fluctuations.

#### AV (Ambulatory Visit)

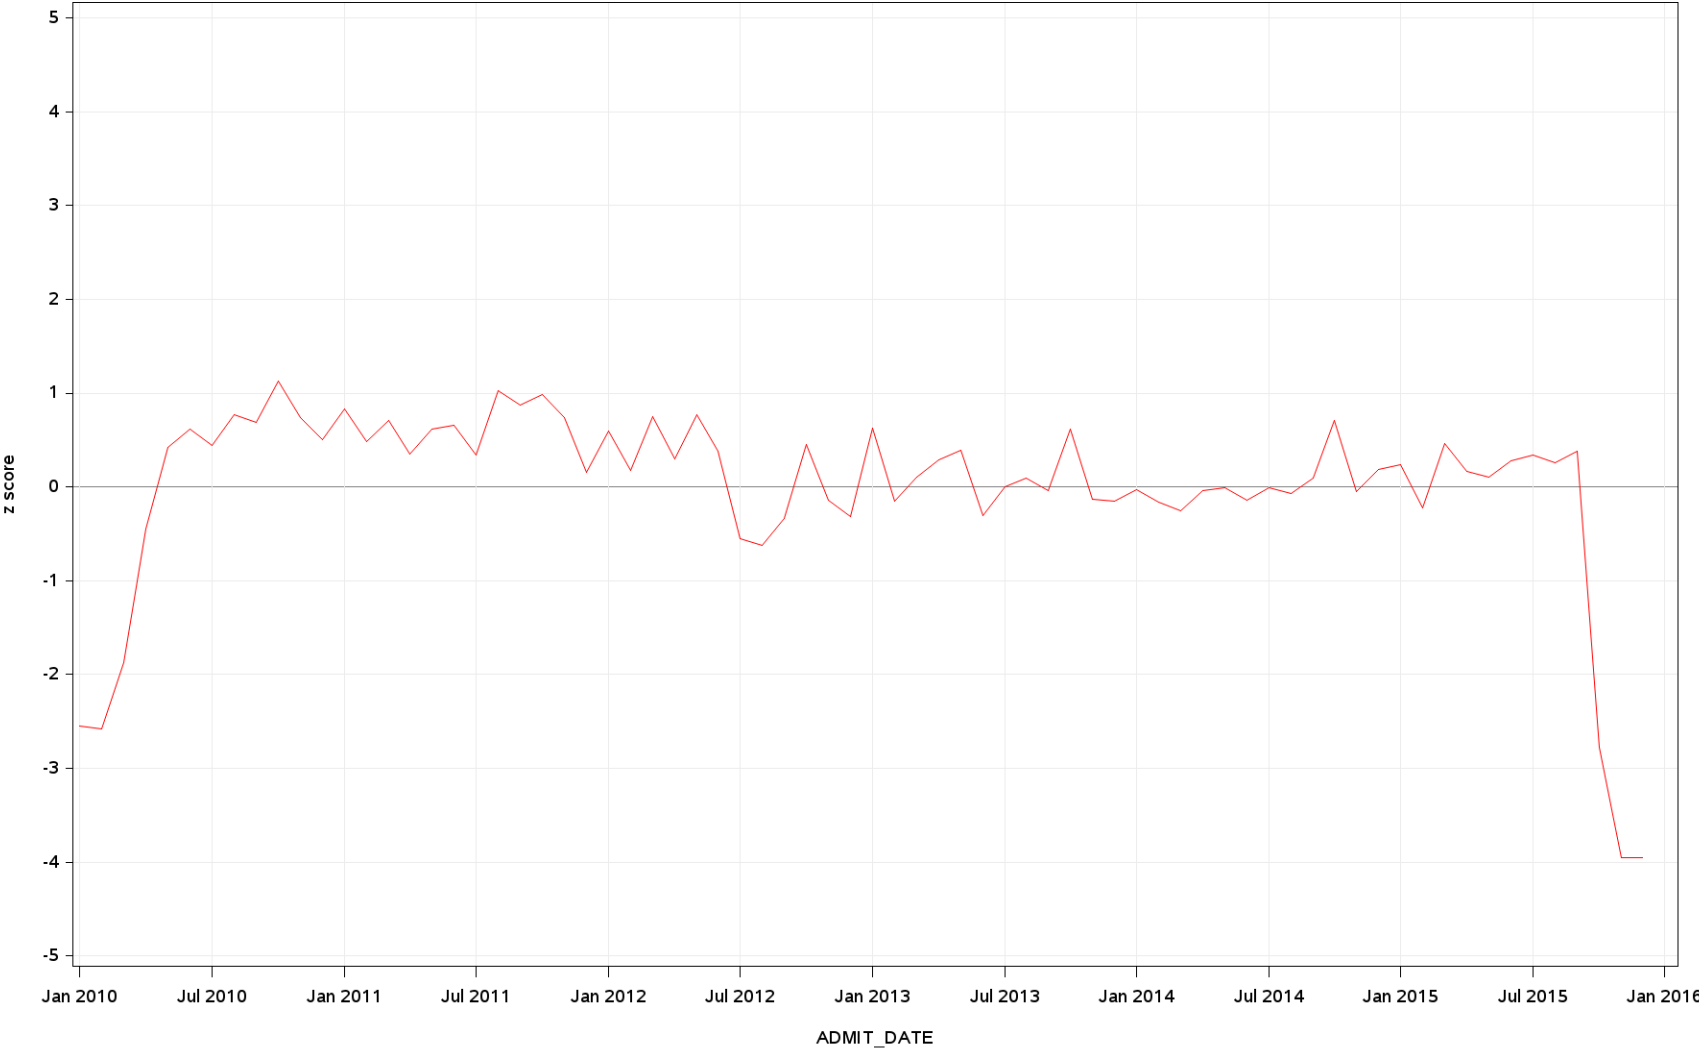

### Chart IB. Trend in Encounters by Admit Date and Encounter Type, 2010-Present

This chart illustrates relative changes over time in the number of records per encounter type found in the ENCOUNTER table. Monthly record counts for each encounter type were standardized over the period shown to have a mean of 0 and a standard deviation of 1. The y-axis therefore reflects the deviation in each month's count from the average over the whole time period. A value above the center line of 0 indicates an above-average number of encounters; a value below the center line of 0 indicates a below-average number of encounters. Incomplete data in recent months or the introduction of new encounter types may contribute to fluctuations.

#### ED (Emergency Dept)

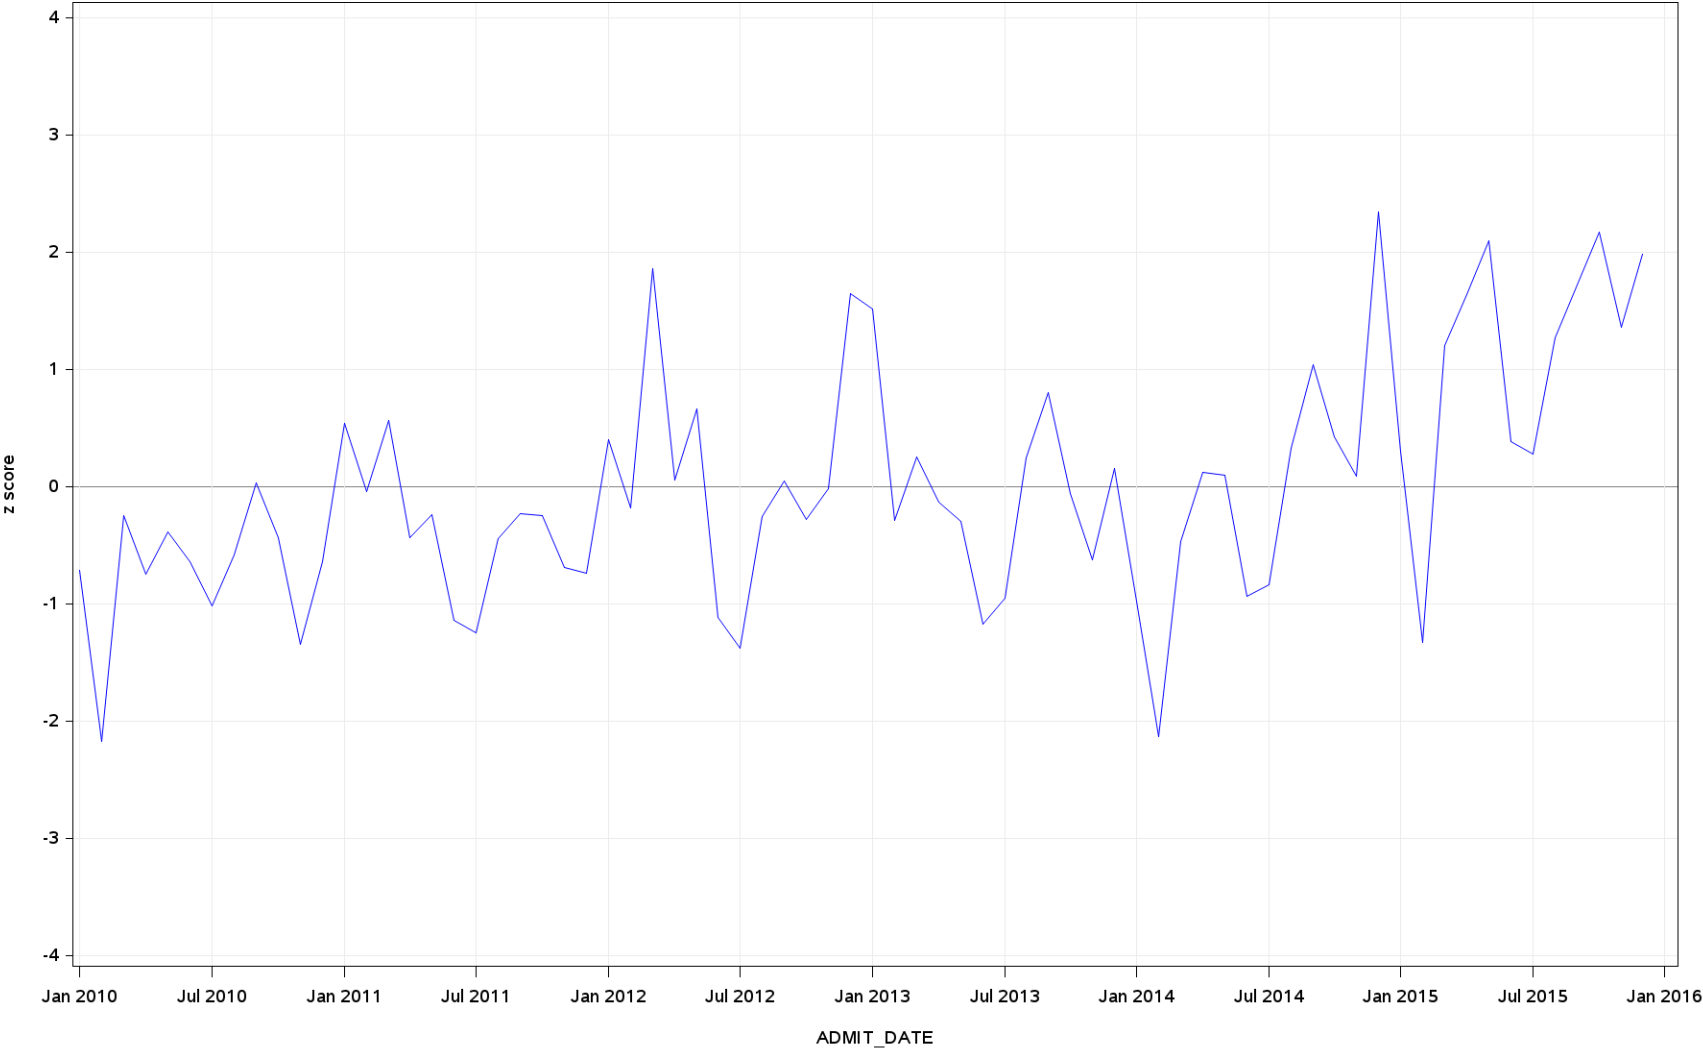

### Chart IB. Trend in Encounters by Admit Date and Encounter Type, 2010-Present

This chart illustrates relative changes over time in the number of records per encounter type found in the ENCOUNTER table. Monthly record counts for each encounter type were standardized over the period shown to have a mean of 0 and a standard deviation of 1. The y-axis therefore reflects the deviation in each month's count from the average over the whole time period. A value above the center line of 0 indicates an above-average number of encounters; a value below the center line of 0 indicates a below-average number of encounters. Incomplete data in recent months or the introduction of new encounter types may contribute to fluctuations.

#### IP (Inpatient Hospital Stay)

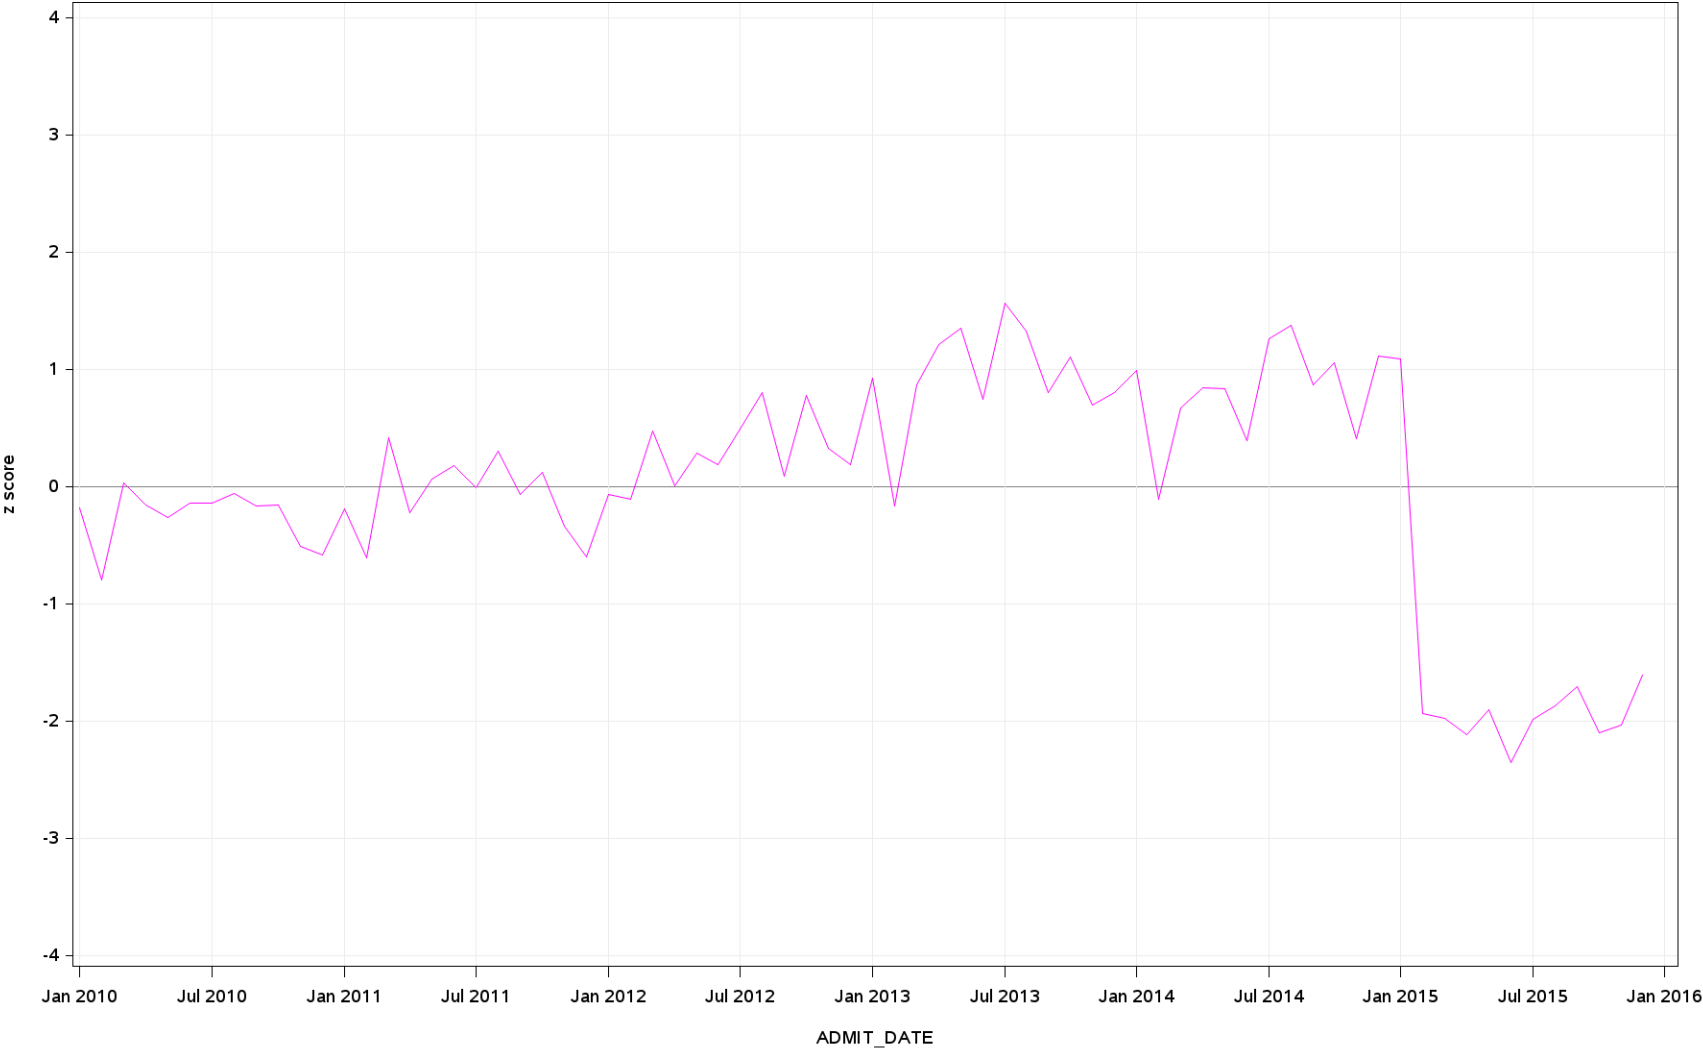

### Chart IC. Trend in Institutional Encounters by Discharge Date and Encounter Type, 2010-Present

This chart illustrates relative changes over time in the number of records per institutional (IP, IS, or EI) encounter type found in the ENCOUNTER table. Monthly record counts for each encounter type were standardized over the period shown to have a mean of 0 and a standard deviation of 1. The y-axis therefore reflects the deviation in each month's count from the average over the whole time period. A value above the center line of 0 indicates an above-average number of encounters; a value below the center line of 0 indicates a below-average number of encounters. Incomplete data in recent months or the introduction of new encounter types may contribute to fluctuations.

#### IP (Inpatient Hospital Stay)

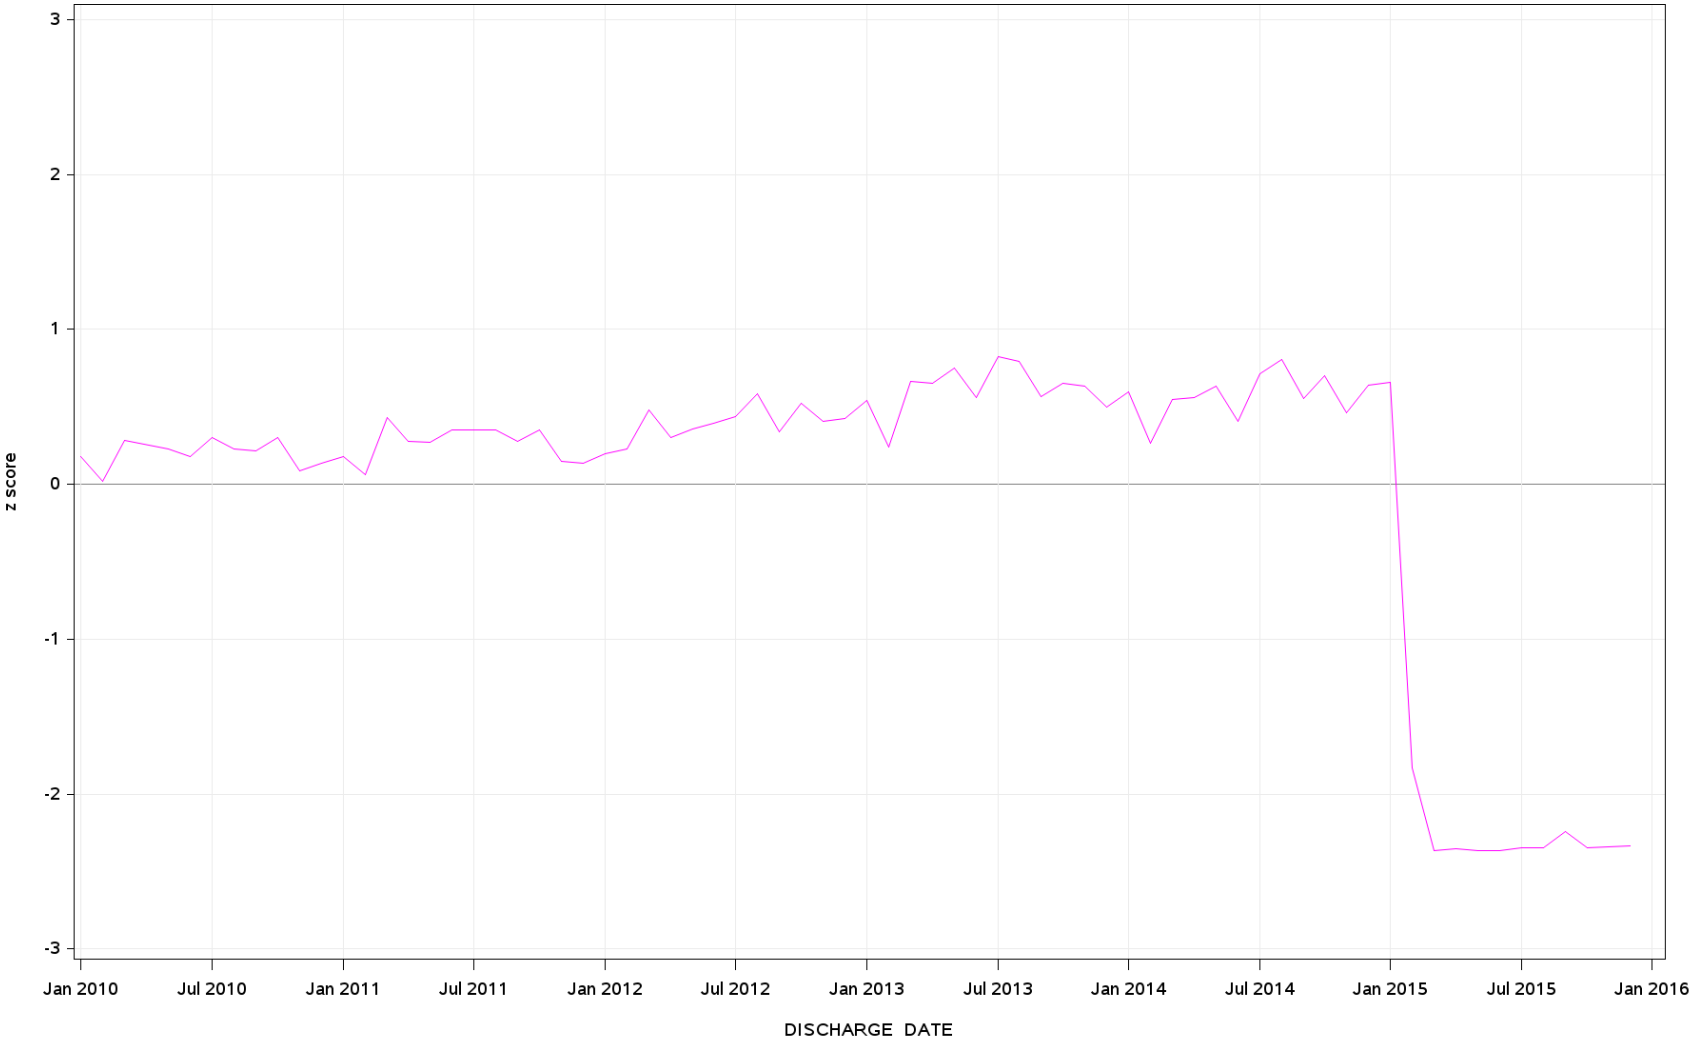

### Table IG. Date Obfuscation or Imputation

This table contains information about the presence of date obfuscation or imputation for relevant fields in the DEMOGRAPHIC, ENROLLMENT, ENCOUNTER, DIAGNOSIS, PROCEDURES, or VITAL tables and supports Data Check 4.05. Imputed or obfuscated dates are permissible but are important to consider when interpreting results.

| Table   | Field               | Date Obfuscation or Imputation | Source table     |
|---------|---------------------|--------------------------------|------------------|
| HARVEST | BIRTH_DATE_MGMT     | No                             | XTBL_L3_METADATA |
| HARVEST | ENR_START_DATE_MGMT | No                             | XTBL_L3_METADATA |
| HARVEST | ENR_END_DATE_MGMT   | No                             | XTBL_L3_METADATA |
| HARVEST | ADMIT_DATE_MGMT     | No                             | XTBL_L3_METADATA |
| HARVEST | DISCHARGE_DATE_MGMT | No                             | XTBL_L3_METADATA |
| HARVEST | PX_DATE_MGMT        | No                             | XTBL_L3_METADATA |
| HARVEST | MEASURE_DATE_MGMT   | No                             | XTBL_L3_METADATA |

Table excludes records with null or missing values.

Cell counts below the low-cell count threshold are displayed as 'BT' and treated as zeroes (0s). Sums which include 'BT' values are marked with an asterisk (\*).

Year=ENCOUNTER.ADMIT\_DATE, ENROLLMENT.ENR\_START\_DATE, DIAGNOSIS.ADMIT\_DATE, PROCEDURES.ADMIT\_DATE, or VITAL.MEASURE\_DATE.

## Table IIA. Primary Key Definitions

This table shows the required primary key definitions for the DEMOGRAPHIC, ENROLLMENT, ENCOUNTER, DIAGNOSIS, PROCEDURES, VITAL and HARVEST tables and supports Data Check 1.05. The ETL will need to be modified to address any area of non-conformance.

| Table       | CDM specifications for primary keys        | Table conforms to specifications? | Source table     |
|-------------|--------------------------------------------|-----------------------------------|------------------|
| DEMOGRAPHIC | PATID is unique                            | Yes                               | DEM_L3_N         |
| ENROLLMENT  | PATID + ENR_START_DATE+ENR_BASIS is unique | Yes                               | ENR_L3_N         |
| ENCOUNTER   | ENCOUNTERID is unique                      | Yes                               | ENC_L3_N         |
| DIAGNOSIS   | DIAGNOSISID is unique                      | Yes                               | DIA_L3_N         |
| PROCEDURES  | PROCEDURESID is unique                     | Yes                               | PRO_L3_N         |
| HARVEST     | NETWORKID+DATAMARTID is unique             | Yes                               | XTBL_L3_METADATA |

Table excludes records with values outside of CDM specifications.

Cell counts below the low-cell count threshold are displayed as 'BT' and treated as zeroes (0s). Sums which include 'BT' values are marked with an asterisk (\*).

If applicable, data check exceptions are highlighted.

## Table IIB. Values Outside of CDM Specifications

This table lists all fields with pre-defined value lists in the DEMOGRAPHIC, ENROLLMENT, ENCOUNTER, DIAGNOSIS, PROCEDURES, and VITAL tables and supports Data Check 1.06. The ETL will need to be modified to address any area of non-conformance.

| Table       | Field                 | Number of records with values outside of specifications | Source table           |
|-------------|-----------------------|---------------------------------------------------------|------------------------|
| DEMOGRAPHIC | SEX                   | 0                                                       | DEM_L3_SEXDIST         |
| DEMOGRAPHIC | HISPANIC              | 0                                                       | DEM_L3_HISPDIST        |
| DEMOGRAPHIC | RACE                  | 0                                                       | DEM_L3_RACEDIST        |
| ENROLLMENT  | ENR_BASIS             | 0                                                       | ENR_L3_BASEDIST        |
| ENCOUNTER   | ENC_TYPE              | 0                                                       | ENC_L3_ENCTYPE         |
| ENCOUNTER   | DISCHARGE_DISPOSITION | 0                                                       | ENC_L3_DISDISP         |
| ENCOUNTER   | DISCHARGE_STATUS      | 0                                                       | ENC_L3_DISSTAT         |
| ENCOUNTER   | DRG_TYPE              | 0                                                       | ENC_L3_DRG_TYPE        |
| ENCOUNTER   | ADMITTING_SOURCE      | 0                                                       | ENC_L3_ADMSRC          |
| DIAGNOSIS   | ENC_TYPE              | 0                                                       | DIA_L3_ENCTYPE         |
| DIAGNOSIS   | DX_TYPE               | 0                                                       | DIA_L3_DXTYPE_DXSOURCE |
| DIAGNOSIS   | DX_SOURCE             | 0                                                       | DIA_L3_DXSOURCE        |
| DIAGNOSIS   | PDX                   | 0                                                       | DIA_L3_PDX             |
| PROCEDURES  | ENC_TYPE              | 0                                                       | PRO_L3_ENCTYPE         |
| PROCEDURES  | PX_SOURCE             | 0                                                       | PRO_L3_PXSOURCE        |

Cell counts below the low-cell count threshold are displayed as 'BT' and treated as zeroes (0s). Sums which include 'BT' values are marked with an asterisk (\*). Data check exceptions are highlighted.



Table IIB. Values Outside of CDM Specifications (continued)

| Table   | Field               | Number of records with values outside of specifications | Source table     |
|---------|---------------------|---------------------------------------------------------|------------------|
| HARVEST | DATAMART_PLATFORM   | 0                                                       | XTBL_L3_METADATA |
| HARVEST | DATAMART_CLAIMS     | 0                                                       | XTBL_L3_METADATA |
| HARVEST | DATAMART_EHR        | 0                                                       | XTBL_L3_METADATA |
| HARVEST | BIRTH_DATE_MGMT     | 0                                                       | XTBL_L3_METADATA |
| HARVEST | ENR_START_DATE_MGMT | 0                                                       | XTBL_L3_METADATA |
| HARVEST | ENR_END_DATE_MGMT   | 0                                                       | XTBL_L3_METADATA |
| HARVEST | ADMIT_DATE_MGMT     | 0                                                       | XTBL_L3_METADATA |
| HARVEST | DISCHARGE_DATE_MGMT | 0                                                       | XTBL_L3_METADATA |
| HARVEST | PX_DATE_MGMT        | 0                                                       | XTBL_L3_METADATA |

Cell counts below the low-cell count threshold are displayed as 'BT' and treated as zeroes (0s). Sums which include 'BT' values are marked with an asterisk (\*). Data check exceptions are highlighted.

## Table IIC. Non-Permissible Missing Values

This table contains the number of records with missing values for all fields which are required to be populated and supports Data Check 1.07. The ETL will need to be modified to address any area of non-conformance.

| Table       | Field          | Number of records with missing values | Source table          |
|-------------|----------------|---------------------------------------|-----------------------|
| DEMOGRAPHIC | PATID          | 0                                     | DEM_L3_N              |
| ENROLLMENT  | PATID          | 0                                     | ENR_L3_N              |
| ENROLLMENT  | ENR_START_DATE | 0                                     | ENR_L3_N              |
| ENROLLMENT  | ENR_BASIS      | 0                                     | ENR_L3_BASEDIST       |
| ENCOUNTER   | PATID          | 0                                     | ENC_L3_N              |
| ENCOUNTER   | ENCOUNTERID    | 0                                     | ENC_L3_N              |
| ENCOUNTER   | ADMIT_DATE     | 0                                     | ENC_L3_ADATE_Y        |
| ENCOUNTER   | ENC_TYPE       | 0                                     | ENC_L3_ENCTYPE        |
| DIAGNOSIS   | DIAGNOSISID    | 0                                     | DIA_L3_N              |
| DIAGNOSIS   | PATID          | 0                                     | DIA_L3_N              |
| DIAGNOSIS   | ENCOUNTERID    | 0                                     | DIA_L3_N              |
| DIAGNOSIS   | DX             | 0                                     | DIA_L3_DX             |
| DIAGNOSIS   | DX_TYPE        | 0                                     | DIA_L3_DXTYPE_ENCTYPE |
| DIAGNOSIS   | DX_SOURCE      | 0                                     | DIA_L3_DXSOURCE       |
| PROCEDURES  | PROCEDURESID   | 0                                     | PRO_L3_N              |
| PROCEDURES  | PATID          | 0                                     | PRO_L3_N              |
| PROCEDURES  | ENCOUNTERID    | 0                                     | PRO_L3_N              |
| PROCEDURES  | PX             | 0                                     | PRO_L3_PX             |
| PROCEDURES  | PX_TYPE        | 0                                     | PRO_L3_PXTYPE_ENCTYPE |
| HARVEST     | NETWORKID      | 0                                     | XTBL_L3_METADATA      |
| HARVEST     | DATAMARTID     | 0                                     | XTBL_L3_METADATA      |

Data check exceptions are highlighted.

### Table IIIA. Future Dates

This table illustrates the percentage of records with future dates for all date fields in the DEMOGRAPHIC, ENROLLMENT, ENCOUNTER, DIAGNOSIS, PROCEDURES, VITAL and HARVEST tables and supports Data Check 2.01. Future dates may be attributable to data entry errors in the source data or ETL errors such as including scheduled appointments in the ENCOUNTER table.

| Records with future dates |                          |           |              |      |                                   |
|---------------------------|--------------------------|-----------|--------------|------|-----------------------------------|
| Table                     | Field                    | Numerator | Denominator  | %    | Source table(s)                   |
| DEMOGRAPHIC               | BIRTH_DATE               | 0         | 3,326,773    | 0.00 | XTBL_L3_DATES; DEM_L3_AGEYRSDIST1 |
| ENROLLMENT                | ENR_START_DATE           | 0         | 2,506,074    | 0.00 | XTBL_L3_DATES; ENR_L3_DIST_START  |
| ENROLLMENT                | ENR_END_DATE             | 0         | 2,506,074    | 0.00 | XTBL_L3_DATES; ENR_L3_DIST_END    |
| ENCOUNTER                 | ADMIT_DATE               | 0         | 228,531,286* | 0.00 | XTBL_L3_DATES; ENC_L3_ADATE_Y     |
| ENCOUNTER                 | DISCHARGE_DATE           | 0         | 74,358,017   | 0.00 | XTBL_L3_DATES; ENC_L3_DDATE_Y     |
| DIAGNOSIS                 | ADMIT_DATE               | 0         | 497,301,023* | 0.00 | XTBL_L3_DATES; DIA_L3_ADATE_Y     |
| PROCEDURES                | ADMIT_DATE               | 0         | 621,128,489* | 0.00 | XTBL_L3_DATES; PRO_L3_ADATE_Y     |
| PROCEDURES                | PX_DATE                  | 0         | 621,036,216* | 0.00 | XTBL_L3_DATES; PRO_L3_PXDATE_Y    |
| HARVEST                   | REFRESH_DEMOGRAPHIC_DATE | 0         |              |      | XTBL_L3_METADATA                  |
| HARVEST                   | REFRESH_ENROLLMENT_DATE  | 0         |              |      | XTBL_L3_METADATA                  |
| HARVEST                   | REFRESH_ENCOUNTER_DATE   | 0         |              |      | XTBL_L3_METADATA                  |
| HARVEST                   | REFRESH_DIAGNOSIS_DATE   | 0         |              |      | XTBL_L3_METADATA                  |
| HARVEST                   | REFRESH_PROCEDURES_DATE  | 0         |              |      | XTBL_L3_METADATA                  |
| HARVEST                   | REFRESH_VITAL_DATE       | 0         |              |      | XTBL_L3_METADATA                  |
| HARVEST                   | REFRESH_MAX              | 0         |              |      | XTBL_L3_METADATA                  |

Denominator excludes null or missing values.

Cell counts below the low-cell count threshold are displayed as 'BT' and treated as zeroes (0s).

### Table IIIB. Records With Extreme Values

This table lists the number of records in the lowest or highest categories of age, height, weight, diastolic blood pressure, and/or systolic blood pressure and supports Data Check 2.02. A high percentage of records in these categories may indicate incorrect measurement units.

| Table       | Field                         | Data Check Parameters |             | Records   | Records with values in the lowest category |     | Records with values in the highest category |      | Source table       |
|-------------|-------------------------------|-----------------------|-------------|-----------|--------------------------------------------|-----|---------------------------------------------|------|--------------------|
|             |                               | Low                   | High        |           | N                                          | %   | N                                           | %    |                    |
| DEMOGRAPHIC | AGE (derived from BIRTH_DATE) | <0 yrs.               | >110 yrs.   | 1,719,513 | 0                                          |     | 23,343                                      | 1.4  | DEM_L3_AGEYRSDIST2 |
| VITAL       | HT                            | <0 inches             | >=95 inches | 1,962,686 | 0                                          |     | 1,945,700                                   | 30.8 | VIT_L3_HT          |
| VITAL       | WT                            | <0 lbs.               | >350 lbs.   | 3,903,620 | 0                                          |     | 292                                         | 0.0  | VIT_L3_WT          |
| VITAL       | DIASTOLIC                     | <40 mgHg              | >120 mgHg   | 5,681,437 | 31,391                                     | 0.5 | 2,453                                       | 0.0  | VIT_L3_DIASTOLIC   |
| VITAL       | SYSTOLIC                      | <40 mgHg              | >210 mgHg   | 5,681,444 | 1,987                                      | 0.0 | 2,184                                       | 0.0  | VIT_L3_SYSTOLIC    |

Table excludes records with values outside of CDM specifications

Cell counts below the low-cell count threshold are displayed as 'BT' and treated as zeroes (0s). Sums which include 'BT' values are marked with an asterisk (\*).

Table excludes records with null or missing values.

Data check exceptions are highlighted.

**Table IVA. Diagnosis Records Per Encounter, Overall and by Encounter Type**

This table displays the average number of diagnoses records per encounter and supports Data Check 3.01. Low number of diagnoses per encounter may be due to source data limitations or incomplete data capture. In general, the number of diagnosis codes should be higher for institutional encounters than for ambulatory encounters.

| Encounter Type                    | DIAGNOSIS records | ENCOUNTER records | Diagnoses Per Encounter | Source table                   |
|-----------------------------------|-------------------|-------------------|-------------------------|--------------------------------|
| AV (Ambulatory Visit)             | 46,287,851        | 22,365,820        | 2.07                    | DIA_L3_ENCTYPE; ENC_L3_ENCTYPE |
| ED (Emergency Dept)               | 703,744           | 215,207           | 3.27                    | DIA_L3_ENCTYPE; ENC_L3_ENCTYPE |
| EI (ED to IP Stay)                | 0                 | 0                 |                         | DIA_L3_ENCTYPE; ENC_L3_ENCTYPE |
| IP (Inpatient Hospital Stay)      | 10,979,189        | 5,596,189         | 1.96                    | DIA_L3_ENCTYPE; ENC_L3_ENCTYPE |
| IS (Non-acute Institutional Stay) | 310,673           | 42,099            | 7.38                    | DIA_L3_ENCTYPE; ENC_L3_ENCTYPE |
| OA (Other Ambulatory Visit)       | 10,430,943        | 21,830,313        | 0.48                    | DIA_L3_ENCTYPE; ENC_L3_ENCTYPE |
| Missing, NI, UN or OT             | 1,322,047         | 6,114,845         | 0.22                    | DIA_L3_ENCTYPE; ENC_L3_ENCTYPE |
| Total                             | 70,034,447        | 56,164,473        | 1.25                    | DIA_L3_ENCTYPE; ENC_L3_ENCTYPE |

Cell counts below the low-cell count threshold are displayed as 'BT' and treated as zeroes (0s). Sums which include 'BT' values are marked with an asterisk (\*). These calculations assume that all encounters in DIAGNOSIS are in ENCOUNTER. Data check exceptions are highlighted.

Chart IVA. Diagnosis Records Per Encounter by Admit Date and Encounter Type, 2010-Present

This chart displays changes over time in the number of diagnosis codes per encounter. Pronounced differences may be due to source data changes including changes in coding practices. Incomplete data in recent months may contribute to fluctuations.

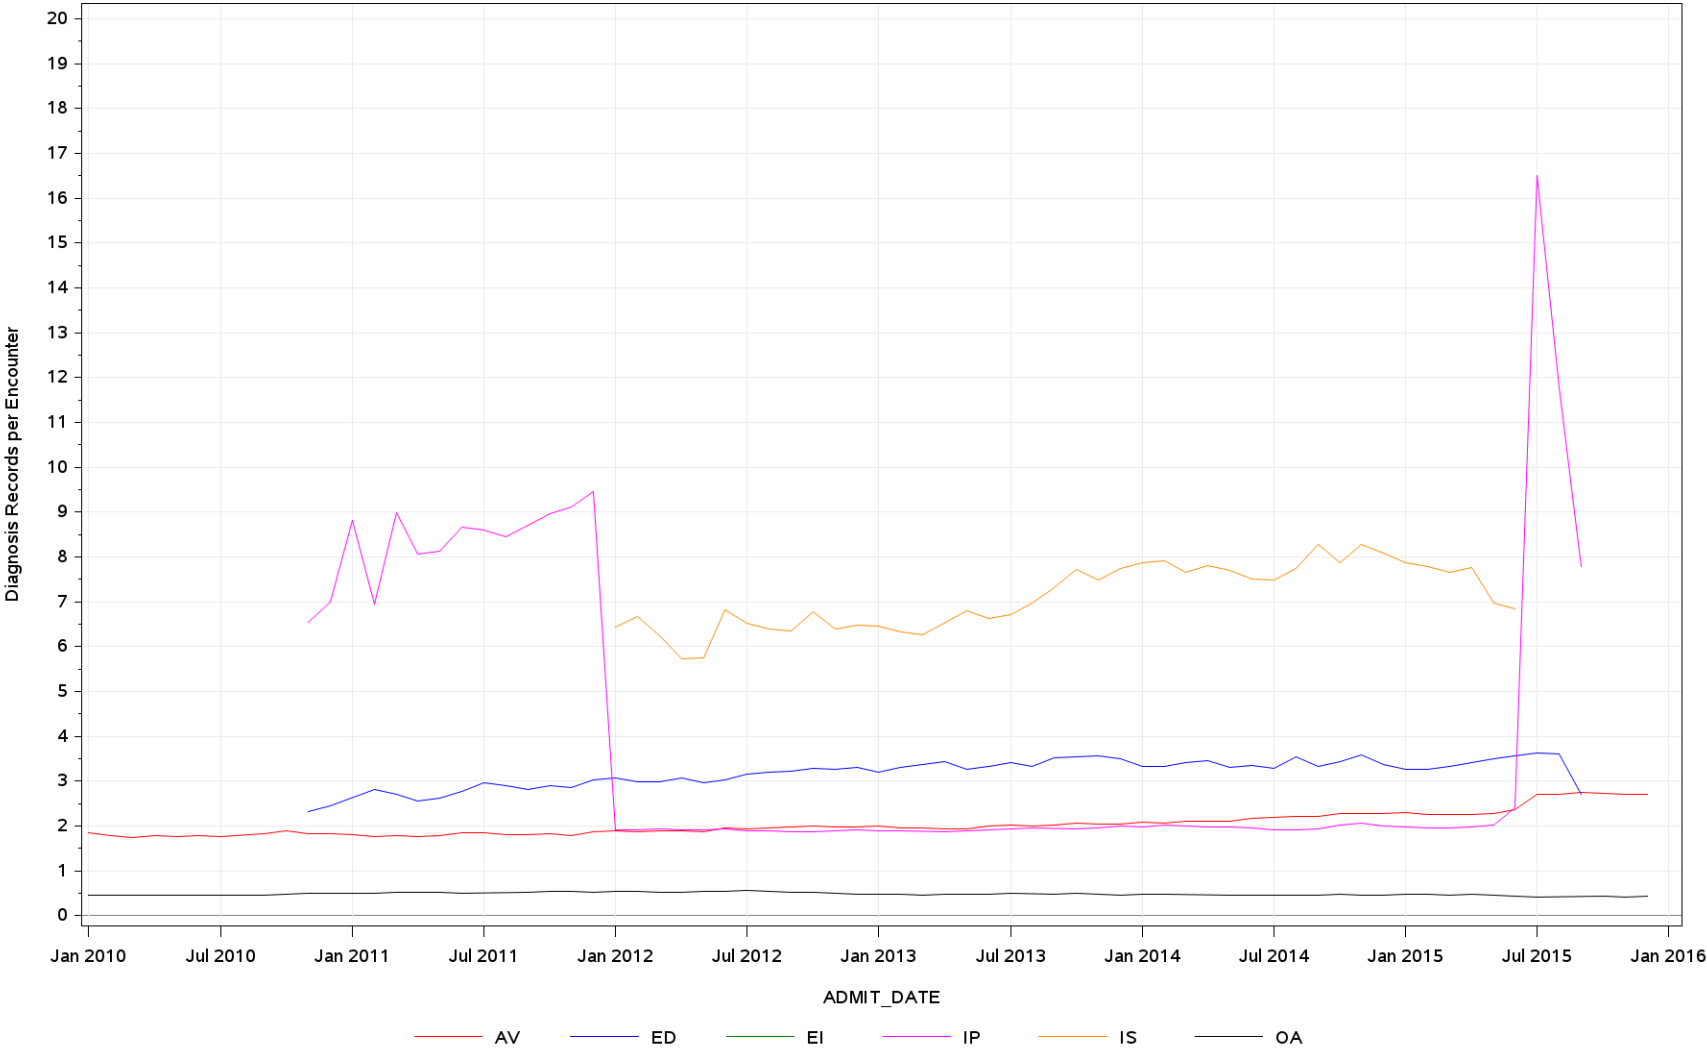

Table IVB. Procedure Records Per Encounter, Overall and by Encounter Type

This table displays the average number of procedure records per encounter and supports Data Check 3.02. Low numbers of procedures per encounter may be due to source data limitations or incomplete data capture.

| Encounter Type                    | PROCEDURES records | ENCOUNTER records | Procedures Per Encounter | Source table                   |
|-----------------------------------|--------------------|-------------------|--------------------------|--------------------------------|
| AV (Ambulatory Visit)             | 36,959,195         | 46,202,069        | 0.80                     | PRO_L3_ENCTYPE; ENC_L3_ENCTYPE |
| ED (Emergency Dept)               | 2,485,366          | 2,819,978         | 0.88                     | PRO_L3_ENCTYPE; ENC_L3_ENCTYPE |
| EI (ED to IP Stay)                | 0                  | 0                 |                          | PRO_L3_ENCTYPE; ENC_L3_ENCTYPE |
| IP (Inpatient Hospital Stay)      | 7,363,249          | 1,776,570         | 4.14                     | PRO_L3_ENCTYPE; ENC_L3_ENCTYPE |
| IS (Non-acute Institutional Stay) | 0                  | 0                 |                          | PRO_L3_ENCTYPE; ENC_L3_ENCTYPE |
| OA (Other Ambulatory Visit)       | 2,219,763          | 24,701,546        | 0.09                     | PRO_L3_ENCTYPE; ENC_L3_ENCTYPE |
| Missing, NI, UN or OT             | 430                | 952,054           | 0.00                     | PRO_L3_ENCTYPE; ENC_L3_ENCTYPE |
| Total                             | 49,028,003         | 76,452,217        | 0.64                     | PRO_L3_ENCTYPE; ENC_L3_ENCTYPE |

Cell counts below the low-cell count threshold are displayed as 'BT' and treated as zeroes (0s). Sums which include 'BT' values are marked with an asterisk (\*). These calculations assume that all encounters in PROCEDURES are in ENCOUNTER. Data check exceptions are highlighted.

### Chart IVB. Procedure Records Per Encounter by Admit Date and Encounter Type, 2010-Present

This chart displays changes over time in the number of procedure codes per encounter. Pronounced differences may be due to source data changes including changes in coding practices. Incomplete data in recent months may contribute to fluctuations.

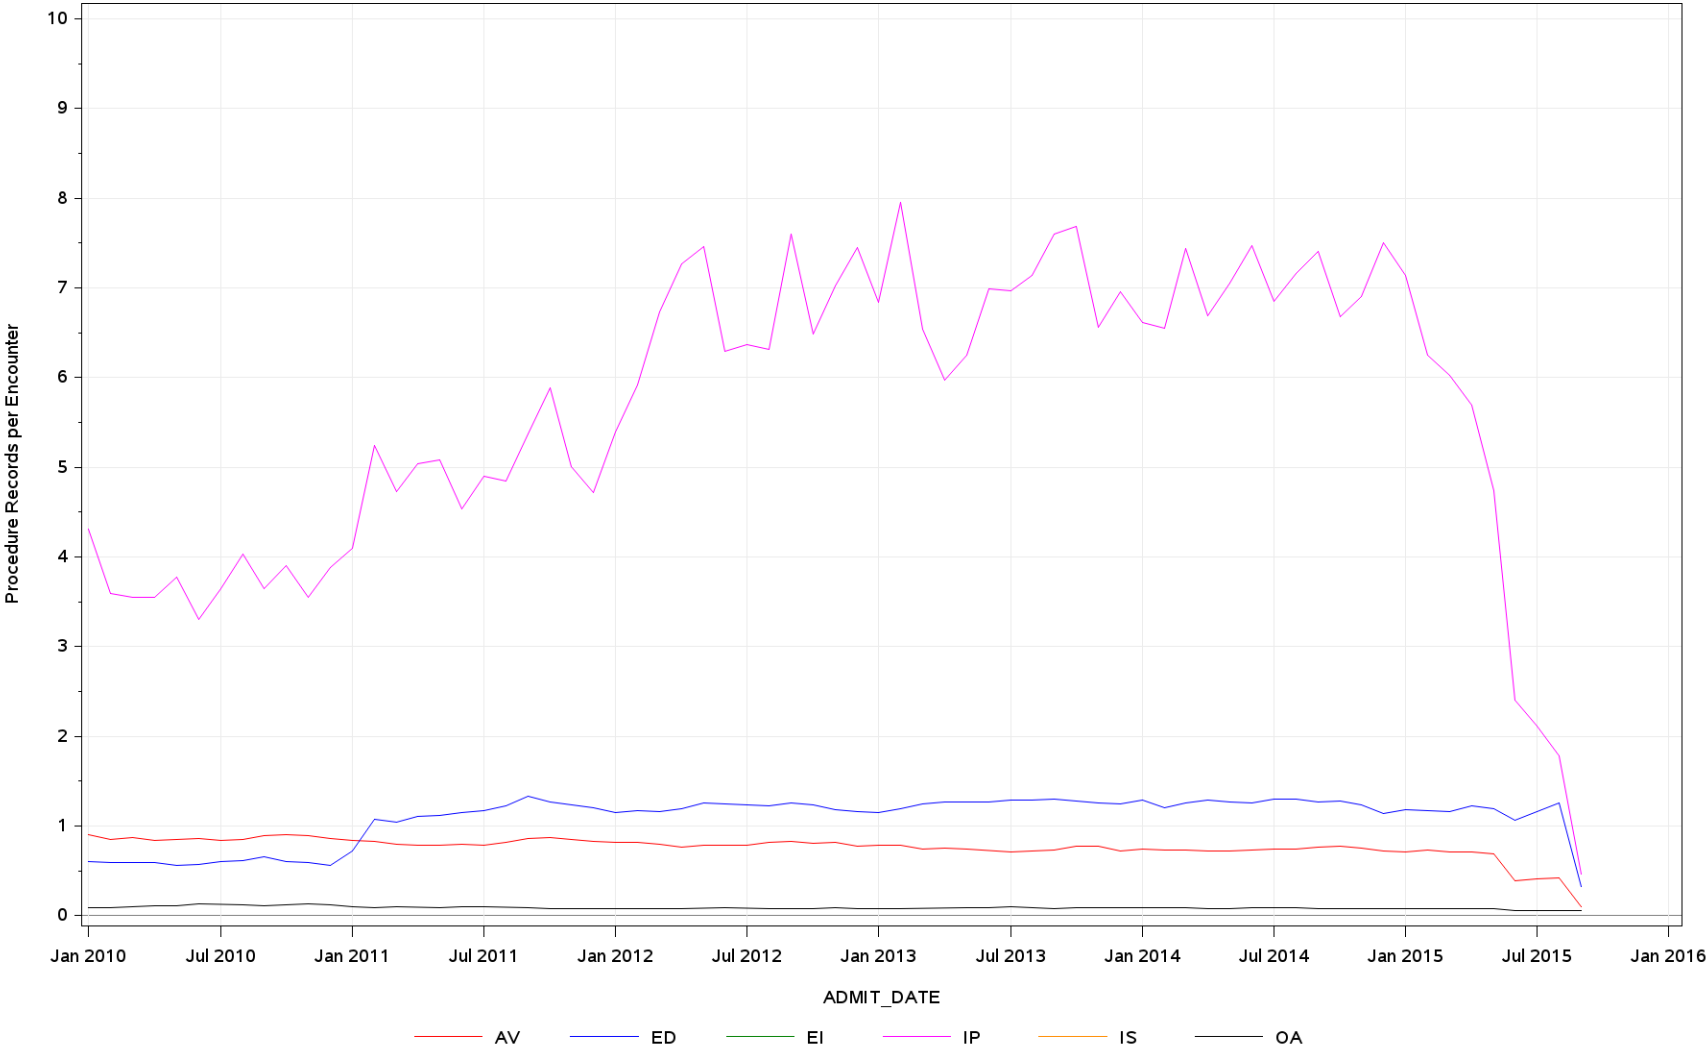



**Table IVC. Missing or Unknown Values**

This table includes fields in the DEMOGRAPHIC, ENROLLMENT, ENCOUNTER, DIAGNOSIS, PROCEDURES and VITAL tables which are included in the query results and are not required to be populated (see Table IIC for required fields). VITAL measures are not included because the VITAL table structure (1 record per result) does not support missingness assessment. The table depicts the percentage of records with missing or unknown values and supports Data Checks 3.03 and 3.04.

| Table       | Field                 | Encounter Type<br>Constraint | Records with missing, NI, UN, or OT values |             |       | Data Check    |           |                         |
|-------------|-----------------------|------------------------------|--------------------------------------------|-------------|-------|---------------|-----------|-------------------------|
|             |                       |                              | Numerator                                  | Denominator | %     | Data<br>Check | Threshold | Source                  |
| DEMOGRAPHIC | BIRTH_DATE            |                              | 0                                          | 3,421,157   |       | 3.03          | >=5%      | DEM_L3_AGEYRSDIST1      |
| DEMOGRAPHIC | SEX                   |                              | 353*                                       | 3,421,157   | 0.0   | 3.03          | >=5%      | DEM_L3_SEXDIST          |
| DEMOGRAPHIC | HISPANIC              |                              | 547,518                                    | 3,421,157   | 16.0  | --            | --        | DEM_L3_HISPDIST         |
| DEMOGRAPHIC | RACE                  |                              | 691,151                                    | 3,421,157   | 20.2  | 3.04          | >=15%     | DEM_L3_RACEDIST         |
| ENROLLMENT  | ENR_END_DATE          |                              | 0                                          | 850,086     |       | --            | --        | ENR_L3_DIST_END         |
| ENCOUNTER   | DISCHARGE_DATE        | IP, IS, EI                   | 246,507                                    | 1,776,378*  | 13.9  | --            | --        | ENC_L3_ENCTYPE_DDATE_YM |
| ENCOUNTER   | ENC_TYPE              |                              | 952,054                                    | 76,452,217  | 1.2   | --            | --        | ENC_L3_ENCTYPE          |
| ENCOUNTER   | PROVIDERID            |                              | 28,402,224                                 | 76,452,217  | 37.2  | --            | --        | ENC_L3_N                |
| ENCOUNTER   | DISCHARGE_DISPOSITION | IP, IS, EI                   | 1,251,701                                  | 1,776,570   | 70.5  | 3.04          | >=15%     | ENC_L3_ENCTYPE_DISDISP  |
| ENCOUNTER   | DISCHARGE_STATUS      | IP, IS, EI                   | 1,382,582                                  | 1,776,554*  | 77.8  | --            | --        | ENC_L3_ENCTYPE_DISSTAT  |
| ENCOUNTER   | DRG                   | IP, IS, EI                   | 1,556,810                                  | 1,771,305*  | 87.9  | --            | --        | ENC_L3_ENCTYPE_DRG      |
| ENCOUNTER   | ADMITTING_SOURCE      | IP, IS, EI                   | 1,323,466                                  | 1,776,557*  | 74.5  | --            | --        | ENC_L3_ENCTYPE_ADMRSC   |
| DIAGNOSIS   | DX_TYPE               |                              | 1,077,349                                  | 75,437,911  | 1.4   | 3.03          | >=5%      | DIA_L3_DXTYPE_DXSOURCE  |
| DIAGNOSIS   | DX_SOURCE             |                              | 75,437,911                                 | 75,437,911  | 100.0 | --            | --        | DIA_L3_DXSOURCE         |
| DIAGNOSIS   | PDX                   | IP, IS, EI                   | 2,880,050                                  | 2,880,050   | 100.0 | 3.04          | >=15%     | DIA_L3_PDX_ENCTYPE      |
| PROCEDURES  | PX_DATE               |                              | 49,028,003                                 | 49,028,003  | 100.0 | --            | --        | PRO_L3_PXDATE_Y         |
| PROCEDURES  | PX_TYPE               |                              | 8,330,619*                                 | 49,028,003  | 17.0  | 3.03          | >=5%      | PRO_L3_PXTYPE_ENCTYPE   |
| PROCEDURES  | PX_SOURCE             |                              | 49,028,003                                 | 49,028,003  | 100.0 | --            | --        | PRO_L3_PXSOURCE         |
| VITAL       | VITAL_SOURCE          |                              | 0                                          | 62,251,061  |       | 3.03          | >=5%      | VIT_L3_VITAL_SOURCE     |

Table excludes records with values outside of CDM specifications

Cell counts for non-missing values are displayed as 'BT' and treated as zeroes (0s). Sums which include 'BT' values are marked with an asterisk (\*).

The four 'flavors of null' defined in the CDM are combined in this table but details are available in the source tables.

Data check exceptions are highlighted.
